# Supplementary material for: A systematic review of subgroup analyses in randomised clinical trials in cardiovascular disease
Source: PubMed Central journal article supplement — Clin Trials. 2021 Jan 21;18(3):351–60. doi: 10.1177/1740774520984866 (PMC8174013; doi:10.1177/1740774520984866), 2021-01-21
Supplement: sj-pdf-1-ctj-10.1177_1740774520984866.pdf [file sj-pdf-1-ctj-10.1177_1740774520984866.pdf]

| Journal | Year Of Publication | Patients Included for Primary Analysis | Quartile Number | Report of SGA | Number of Reported SGA | Adjustment for Multiple Testing | Specification Time of SGA | Study Protocol Provided | SGA Prespecified within Protocol | Test for Interaction Reported | Significant Heterogeneity of Treatment Effects | Type of Intervention under Study | Trial Design | Result of Primary Statistical Analysis |
|---------|---------------------|----------------------------------------|-----------------|---------------|------------------------|---------------------------------|---------------------------|-------------------------|----------------------------------|-------------------------------|------------------------------------------------|----------------------------------|--------------|----------------------------------------|
| 1       | 2                   | 3206                                   | 4               | 1             | 30                     | 0                               | 1                         | 1                       | 1                                | 1                             | 1                                              | 1                                | 0            | 0                                      |
| 1       | 2                   | 7513                                   | 4               | 1             | 36                     | 0                               | 1                         | 1                       | 1                                | 1                             | 1                                              | 1                                | 1            | 0                                      |
| 1       | 2                   | 9013                                   | 4               | 1             | 10                     | 0                               | 0                         | 1                       | 0                                | 1                             | 0                                              | 3                                | 1            | 0                                      |
| 1       | 2                   | 3102                                   | 4               | 1             | 6                      | 0                               | 1                         | 1                       | 1                                | 1                             | 0                                              | 2                                | 1            | 0                                      |
| 1       | 2                   | 13199                                  | 4               | 1             | 15                     | 0                               | 1                         | 1                       | 1                                | 1                             | 0                                              | 1                                | 1            | 0                                      |
| 1       | 2                   | 3876                                   | 4               | 1             | 13                     | 1                               | 1                         | 1                       | 1                                | 1                             | 0                                              | 1                                | 1            | 1                                      |
| 1       | 2                   | 12705                                  | 4               | 1             | 42                     | 0                               | 1                         | 1                       | 1                                | 1                             | 1                                              | 1                                | 1            | 1                                      |
| 1       | 2                   | 9340                                   | 4               | 1             | 14                     | 0                               | 1                         | 1                       | 1                                | 1                             | 1                                              | 1                                | 1            | 1                                      |
| 1       | 2                   | 3297                                   | 4               | 1             | 14                     | 0                               | 1                         | 1                       | 1                                | 1                             | 0                                              | 1                                | 0            | 1                                      |
| 1       | 2                   | 24081                                  | 4               | 1             | 12                     | 0                               | 1                         | 1                       | 1                                | 1                             | 0                                              | 1                                | 0            | 1                                      |
| 2       | 1                   | 130                                    | 1               | 0             |                        |                                 |                           | 0                       |                                  |                               |                                                | 2                                | 0            | 0                                      |
| 2       | 1                   | 47                                     | 1               | 0             |                        |                                 |                           | 0                       |                                  |                               |                                                | 1                                | 1            | 1                                      |
| 2       | 1                   | 101                                    | 1               | 0             |                        |                                 |                           | 0                       |                                  |                               |                                                | 1                                | 1            | 1                                      |
| 2       | 1                   | 314                                    | 2               | 0             |                        |                                 |                           | 0                       |                                  |                               |                                                | 1                                | 1            | 1                                      |
| 2       | 1                   | 428                                    | 2               | 0             |                        |                                 |                           | 0                       |                                  |                               |                                                | 4                                | 1            | 1                                      |
| 2       | 1                   | 399                                    | 2               | 0             |                        |                                 |                           | 0                       |                                  |                               |                                                | 1                                | 1            | 1                                      |
| 2       | 1                   | 2500                                   | 3               | 0             |                        |                                 |                           | 0                       |                                  |                               |                                                | 2                                | 0            | 1                                      |
| 2       | 1                   | 4146                                   | 4               | 0             |                        |                                 |                           | 0                       |                                  |                               |                                                | 4                                | 1            | 1                                      |
| 2       | 1                   | 168                                    | 1               | 1             | 2                      | 0                               | 1                         | 0                       |                                  | 1                             | 1                                              | 1                                | 0            | 1                                      |
| 2       | 1                   | 627                                    | 2               | 1             | 7                      | 0                               | 0                         | 0                       |                                  | 1                             | 1                                              | 3                                | 1            | 1                                      |
| 2       | 1                   | 877                                    | 2               | 1             | 30                     | 0                               | 1                         | 0                       |                                  | 1                             | 0                                              | 1                                | 1            | 1                                      |
| 2       | 1                   | 2104                                   | 3               | 1             | 35                     | 0                               | 1                         | 0                       |                                  | 1                             | 0                                              | 4                                | 1            | 1                                      |
| 2       | 1                   | 8404                                   | 4               | 1             | 40                     | 0                               | 1                         | 0                       |                                  | 1                             | 1                                              | 3                                | 1            | 1                                      |
| 2       | 1                   | 2999                                   | 4               | 1             | 11                     | 0                               | 1                         | 0                       |                                  | 1                             | 0                                              | 3                                | 0            | 1                                      |
| 2       | 1                   | 5380                                   | 4               | 1             | 8                      | 0                               | 0                         | 0                       |                                  | 1                             | 0                                              | 1                                | 0            | 1                                      |
| 2       | 2                   | 109                                    | 1               | 0             |                        |                                 |                           | 0                       |                                  |                               |                                                | 1                                | 1            | 1                                      |
| 2       | 2                   | 501                                    | 2               | 0             |                        |                                 |                           | 0                       |                                  |                               |                                                | 3                                | 1            | 0                                      |
| 2       | 2                   | 448                                    | 2               | 0             |                        |                                 |                           | 0                       |                                  |                               |                                                | 1                                | 1            | 1                                      |
| 2       | 2                   | 190                                    | 1               | 1             | 3                      | 0                               | 1                         | 0                       |                                  | 1                             | 0                                              | 1                                | 1            | 0                                      |
| 2       | 2                   | 243                                    | 1               | 1             | 20                     | 0                               | 3                         | 0                       |                                  | 1                             | 1                                              | 1                                | 1            | 0                                      |
| 2       | 2                   | 457                                    | 2               | 1             | 6                      | 0                               | 0                         | 0                       |                                  | 1                             | 1                                              | 3                                | 1            | 1                                      |
| 2       | 2                   | 450                                    | 2               | 1             | 2                      | 0                               | 0                         | 0                       |                                  | 1                             | 0                                              | 4                                | 0            | 1                                      |
| 2       | 2                   | 2604                                   | 3               | 1             | 14                     | 0                               | 1                         | 0                       |                                  | 1                             | 0                                              | 1                                | 1            | 0                                      |
| 2       | 2                   | 1215                                   | 3               | 1             | 7                      | 0                               | 2                         | 0                       |                                  | 1                             | 0                                              | 3                                | 1            | 0                                      |
| 2       | 2                   | 2199                                   | 3               | 1             | 46                     | 0                               | 0                         | 0                       |                                  | 0                             | 0                                              | 1                                | 1            | 0                                      |
| 2       | 2                   | 1184                                   | 3               | 1             | 1                      | 0                               | 0                         | 0                       |                                  | 0                             | 0                                              | 3                                | 0            | 1                                      |
| 2       | 2                   | 3232                                   | 4               | 1             | 24                     | 0                               | 0                         | 0                       |                                  | 1                             | 1                                              | 1                                | 1            | 0                                      |
| 2       | 2                   | 3514                                   | 4               | 1             | 22                     | 0                               | 1                         | 0                       |                                  | 1                             | 0                                              | 3                                | 0            | 1                                      |
| 3       | 1                   | 160                                    | 1               | 0             |                        |                                 |                           | 0                       |                                  |                               |                                                | 4                                | 1            | 0                                      |
| 3       | 1                   | 22                                     | 1               | 0             |                        |                                 |                           | 0                       |                                  |                               |                                                | 1                                | 1            | 0                                      |
| 3       | 1                   | 253                                    | 1               | 0             |                        |                                 |                           | 0                       |                                  |                               |                                                | 1                                | 1            | 0                                      |
| 3       | 1                   | 248                                    | 1               | 0             |                        |                                 |                           | 0                       |                                  |                               |                                                | 4                                | 1            | 1                                      |
| 3       | 1                   | 119                                    | 1               | 0             |                        |                                 |                           | 0                       |                                  |                               |                                                | 3                                | 1            | 1                                      |
| 3       | 1                   | 160                                    | 1               | 0             |                        |                                 |                           | 0                       |                                  |                               |                                                | 4                                | 1            | 1                                      |
| 3       | 1                   | 47                                     | 1               | 0             |                        |                                 |                           | 0                       |                                  |                               |                                                | 1                                | 1            | 1                                      |
| 3       | 1                   | 151                                    | 1               | 0             |                        |                                 |                           | 0                       |                                  |                               |                                                | 1                                | 1            | 1                                      |
| 3       | 1                   | 322                                    | 2               | 0             |                        |                                 |                           | 0                       |                                  |                               |                                                | 3                                | 0            | 1                                      |
| 3       | 1                   | 2291                                   | 3               | 0             |                        |                                 |                           | 0                       |                                  |                               |                                                | 3                                | 0            | 1                                      |
| 3       | 1                   | 400                                    | 2               | 1             | 21                     | 0                               | 3                         | 0                       |                                  | 1                             | 0                                              | 3                                | 1            | 0                                      |
| 3       | 1                   | 441                                    | 2               | 1             | 10                     | 0                               | 0                         | 0                       |                                  | 1                             | 1                                              | 4                                | 1            | 0                                      |
| 3       | 1                   | 363                                    | 2               | 1             | 12                     | 0                               | 1                         | 0                       |                                  | 1                             | 0                                              | 1                                | 1            | 0                                      |
| 3       | 1                   | 300                                    | 2               | 1             | 1                      | 0                               | 0                         | 0                       |                                  | 1                             | 0                                              | 3                                | 0            | 1                                      |
| 3       | 1                   | 617                                    | 2               | 1             | 9                      | 0                               | 2                         | 0                       |                                  | 1                             | 0                                              | 1                                | 1            | 1                                      |
| 3       | 1                   | 2086                                   | 3               | 1             | 1                      | 0                               | 1                         | 0                       |                                  | 1                             | 1                                              | 4                                | 1            | 1                                      |
| 3       | 1                   | 7173                                   | 4               | 1             | 6                      | 0                               | 0                         | 0                       |                                  | 0                             | 0                                              | 4                                | 1            | 1                                      |
| 3       | 2                   | 120                                    | 1               | 0             |                        |                                 |                           | 0                       |                                  |                               |                                                | 1                                | 1            | 0                                      |
| 3       | 2                   | 203                                    | 1               | 0             |                        |                                 |                           | 0                       |                                  |                               |                                                | 4                                | 1            | 1                                      |
| 3       | 2                   | 203                                    | 1               | 0             |                        |                                 |                           | 0                       |                                  |                               |                                                | 1                                | 1            | 1                                      |
| 3       | 2                   | 50                                     | 1               | 0             |                        |                                 |                           | 0                       |                                  |                               |                                                | 1                                | 1            | 1                                      |

| Journal | Year Of Publication | Patients Included for Primary Analysis | Quartile Number | Report of SGA | Number of Reported SGA | Adjustment for Multiple Testing | Specification Time of SGA | Study Protocol Provided | SGA Prespecified within Protocol | Test for Interaction Reported | Significant Heterogeneity of Treatment Effects | Type of Intervention under Study | Trial Design | Result of Primary Statistical Analysis |
|---------|---------------------|----------------------------------------|-----------------|---------------|------------------------|---------------------------------|---------------------------|-------------------------|----------------------------------|-------------------------------|------------------------------------------------|----------------------------------|--------------|----------------------------------------|
| 3       | 2                   | 240                                    | 1               | 0             |                        |                                 |                           | 0                       |                                  |                               |                                                | 4                                | 1            | 1                                      |
| 3       | 2                   | 51                                     | 1               | 0             |                        |                                 |                           | 0                       |                                  |                               |                                                | 4                                | 1            | 1                                      |
| 3       | 2                   | 246                                    | 1               | 0             |                        |                                 |                           | 0                       |                                  |                               |                                                | 4                                | 1            | 1                                      |
| 3       | 2                   | 302                                    | 2               | 0             |                        |                                 |                           | 0                       |                                  |                               |                                                | 1                                | 1            | 1                                      |
| 3       | 2                   | 358                                    | 2               | 0             |                        |                                 |                           | 0                       |                                  |                               |                                                | 1                                | 1            | 1                                      |
| 3       | 2                   | 1258                                   | 3               | 0             |                        |                                 |                           | 0                       |                                  |                               |                                                | 1                                | 0            | 1                                      |
| 3       | 2                   | 151                                    | 1               | 1             | 2                      | 0                               | 0                         | 0                       |                                  | 0                             | 0                                              | 4                                | 1            | 1                                      |
| 3       | 2                   | 60                                     | 1               | 1             | 8                      | 0                               | 1                         | 0                       |                                  | 1                             | 1                                              | 4                                | 1            | 1                                      |
| 3       | 2                   | 1230                                   | 3               | 1             | 7                      | 0                               | 0                         | 0                       |                                  | 1                             | 0                                              | 1                                | 1            | 0                                      |
| 3       | 2                   | 1198                                   | 3               | 1             | 6                      | 0                               | 1                         | 0                       |                                  | 0                             | 0                                              | 4                                | 1            | 0                                      |
| 3       | 2                   | 1372                                   | 3               | 1             | 14                     | 0                               | 1                         | 0                       |                                  | 1                             | 1                                              | 4                                | 1            | 1                                      |
| 3       | 2                   | 7402                                   | 4               | 1             | 2                      | 0                               | 0                         | 0                       |                                  | 1                             | 0                                              | 1                                | 1            | 0                                      |

**Journal:** 1 = The New England Journal of Medicine  
2 = The Lancet  
3 = Circulation

**Year of publication:** 1 = 2015  
2 = 2016

**Report of SGA** 0 = No SGA Reported  
1 = SGA Reported

**Adjustment for Multiple Testing:** 0 = No Adjustment made  
1 = Adjustment made

**Specification Time of SGA** 0 = Unclear  
1 = Prespecified  
2 = Post-hoc  
3 = Prespecified and post-hoc

**Study Protocol Provided** 0 = No  
1 = Yes

**SGA Prespecified within Protocol** 0 = SGA not Prespecified within Protocol  
1 = SGA Prespecified within Protocol

**Test for Interaction Reported** 0 = No Report of Test for Interaction  
1 = Report of Test for Interaction

**Significant Heterog. of Treatment Effects** 0 = No Significant Heterogeneity  
1 = Significant Heterogeneity

**Type of Intervention under Study** 1 = Pharmaceutical  
2 = Surgical  
3 = Endovascular  
4 = Others

**Trial Design** 0 = Non-Inferiority-Trial  
1 = Superiority-Trial

**Result of Primary Statistical Analysis** 0 = Not Significant  
1 = Significant
