# Supplementary material for: A systematic review of subgroup analyses in randomised clinical trials in cardiovascular disease
Source: PubMed Central journal article supplement — Clin Trials. 2021 Jan 21;18(3):351–60. doi: 10.1177/1740774520984866 (PMC8174013; doi:10.1177/1740774520984866), 2021-01-21
Supplement: sj-pdf-2-ctj-10.1177_1740774520984866.pdf [file sj-pdf-2-ctj-10.1177_1740774520984866.pdf]

**Figure S1:** Cut-off values for the definition of subgroups for quantitative characteristics.

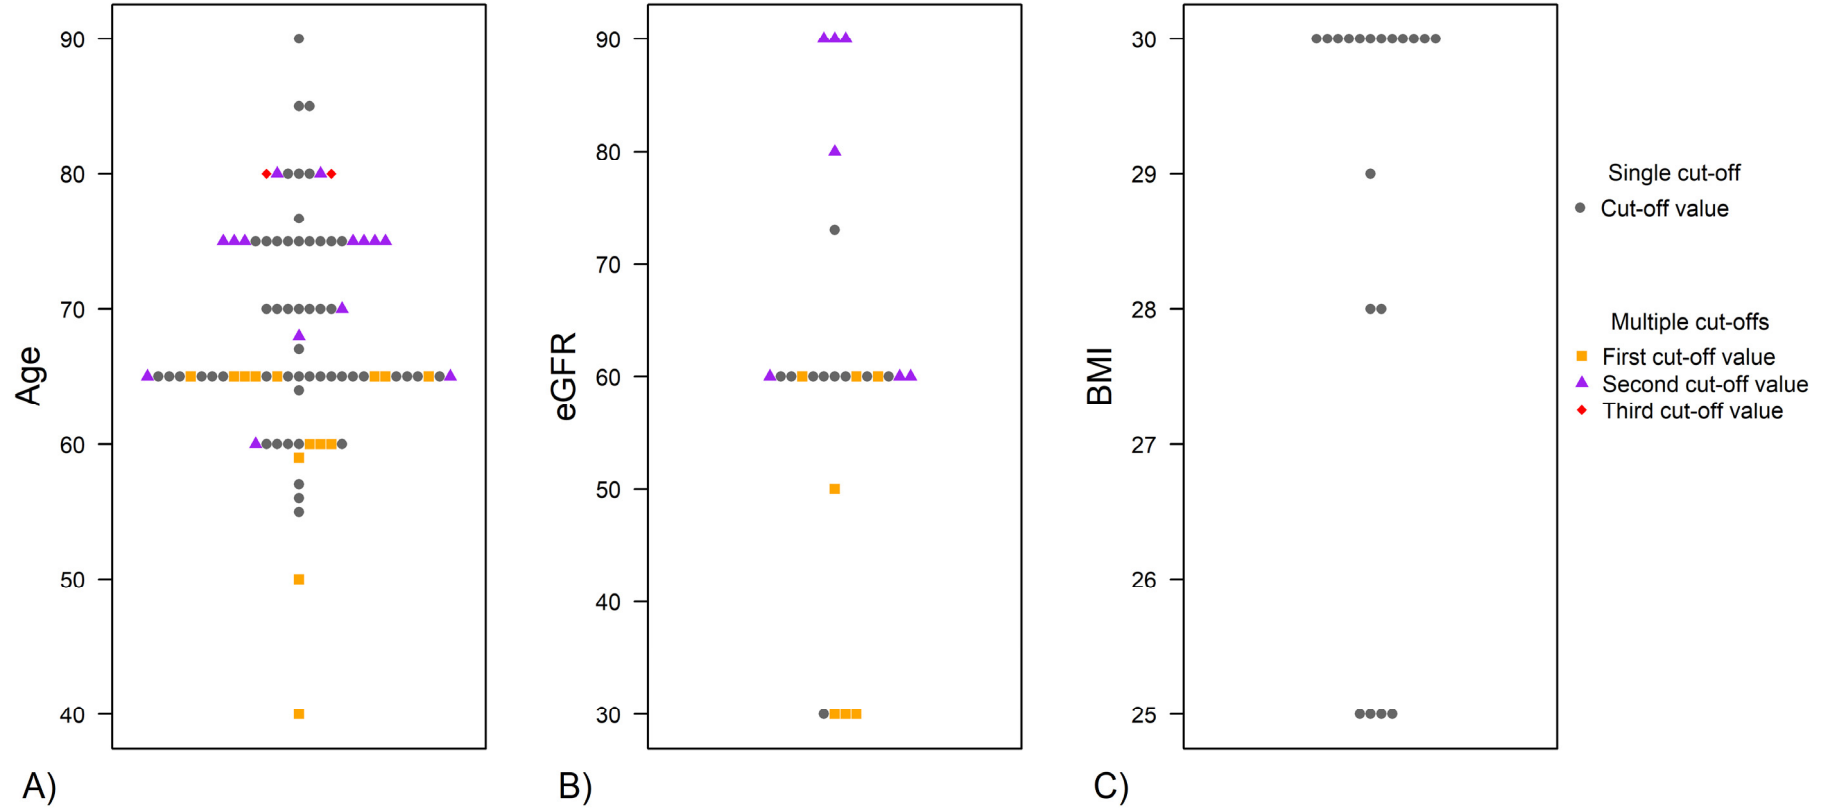

Distribution of defined cut-off values for the categorisation of subgroups according to patients' age (A), estimated glomerular filtration rate (B), and body-mass-index (C) in the reviewed randomised cardiovascular trials.
